# Supplementary material for: Methylglyoxal-Modified Albumin Effects on Endothelial Arginase Enzyme and Vascular Function
Source: MDPI journal article supplement (doi:10.3390/cells12050795), 2023-03-03
Supplement: s1 [file s1]

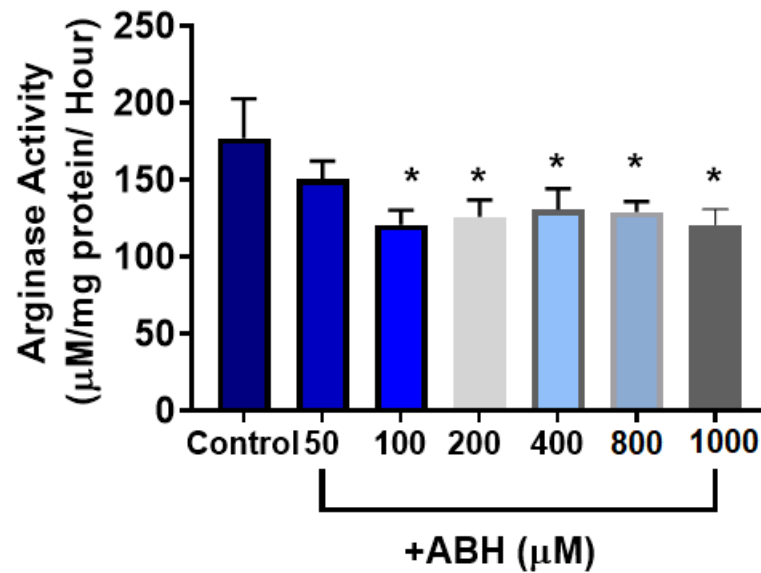

Figure S1 : The graph represents concentrations of ABH for arginase enzyme activity inhibition in MAEC cells. \* $p < 0.01$  control vs. ABH. Concentration of 100  $\mu\text{M}$  and above significantly inhibited arginase activity in MAEC cells. Values are expressed as means  $\pm$  SE from 5 independent experiments carried out in triplicates.
